# Supplementary material for: Proteomic analysis of cadmium exposure in cultured lung epithelial cells: evidence for oxidative stress-induced cytotoxicity
Source: Royal Society of Chemistry journal article supplement (doi:10.1039/c3tx50014d), 2013-01-01
Supplement: c3tx50014d.pdf [file c3tx50014d.pdf]

**Supplementary Data**

**Proteomic analysis of cadmium exposure in cultured lung epithelial cells: evidence for oxidative stress-induced cytotoxicity**

Yan-Ming Xu,<sup>a,b</sup> Yuan Zhou,<sup>c</sup> De-Ju Chen,<sup>a,b</sup> Dong-Yang Huang,<sup>b</sup> Jen-Fu Chiu<sup>\*c</sup> and Andy T. Y. Lau<sup>\*a,b</sup>

*<sup>a</sup> Laboratory of Cancer Biology and Epigenetics, <sup>b</sup> Department of Cell Biology and Genetics, Shantou University Medical College, Shantou, Guangdong 515041, China*

*E-mail: andytlau@stu.edu.cn*

*<sup>c</sup> Department of Anatomy, Li Ka Shing Faculty of Medicine, The University of Hong Kong, Hong Kong, China*

*E-mail: jfchiu@hku.hk*

## Supplementary Materials

**Table S1** Summary statistics of protein spots in this study

| Treatment     | Number of spots detected |         |         | No. of spots<br>(Mean $\pm$<br>S.D.) | No. of<br>spots ><br>2-fold<br>difference* | No. of spots<br>identified by<br>MS | No. of spots<br>selected for<br>further study<br>in this work |
|---------------|--------------------------|---------|---------|--------------------------------------|--------------------------------------------|-------------------------------------|---------------------------------------------------------------|
|               | Trial 1                  | Trial 2 | Trial 3 |                                      |                                            |                                     |                                                               |
| Control       | 1120                     | 1134    | 1180    | 1145 $\pm$ 31                        | 18                                         | 11                                  | 7                                                             |
| 20 $\mu$ M Cd | 1023                     | 998     | 1040    | 1020 $\pm$ 21                        |                                            |                                     |                                                               |
| Control       | 1104                     | 1128    | 1138    | 1123 $\pm$ 17                        | 0                                          |                                     |                                                               |
| 2 $\mu$ M Cd  | 1076                     | 1109    | 1053    | 1079 $\pm$ 28                        |                                            |                                     |                                                               |

\* Average expression level in cadmium-treated cells compared with LECs from three independent analyses.
